# Supplementary material
Source: Springer Nature journal article supplement (https://www.springermedizin.de/resource/supplementary/13012_2008_218_MOESM1_ESM.pdf/9629570)
Supplement: MOESM1 [file 9629570]

- Local implementation teams were established and were encouraged to set goals and to develop implementations plans.
- Documentation of quality indicators was used initially as objective data to identify deviance to the guidelines and local needs of training.
- Planned action and intervention based on the needs (based on local data).
- The local implementation teams held regular meetings with all staff and encouraged feedback and identification of potential barriers and promoters of change.
- Team and network meetings were performed to learn about successful implementations techniques.
- Academic outreach detailing was used to facilitate individuals and teams to analyse, reflect and change their own attitudes and behaviours.
